# Supplementary figures and images for: High nitrogen inhibits biomass and saponins accumulation in a medicinal plant Panax notoginseng
Source: PeerJ journal article supplement (doi:10.7717/peerj.14933), 2023-02-21

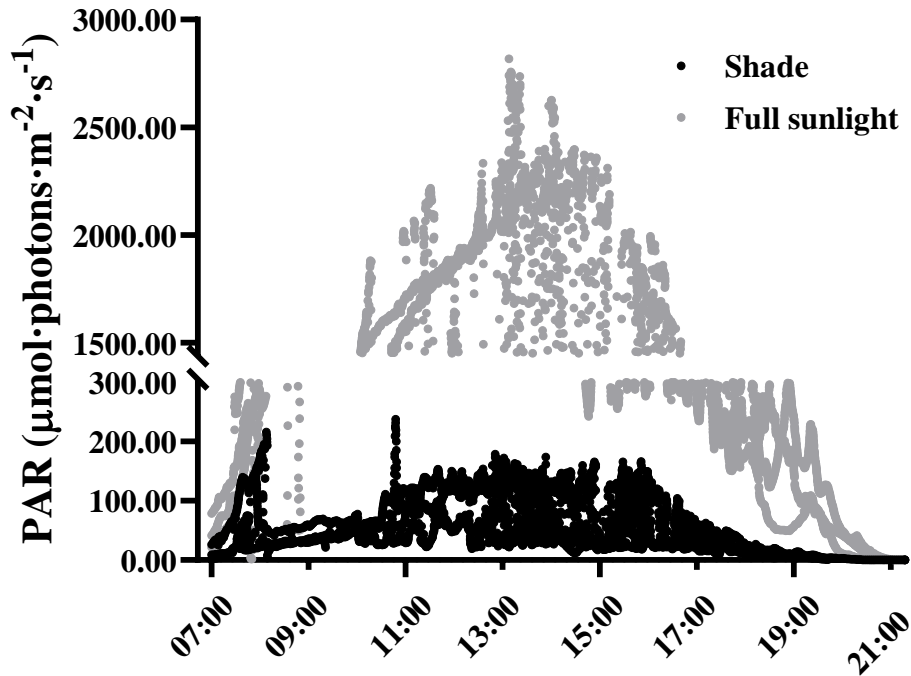

Supplement: Raw_Data.zip [file Raw_Data.zip]
